# Supplementary material
Source: ML conference proceedings conference paper supplement (https://proceedings.neurips.cc/paper_files/paper/2022/hash/2d779258dd899505b56f237de66ae470-Abstract.html)
Supplement: Supplementary file 1 [file 2d779258dd899505b56f237de66ae470-Supplemental-Conference.zip]

Archive with 3 entries (2 files):
- 9605_C.Oh et.al - Supp/
- 9605_C.Oh et.al - Supp/9605_C.Oh et.al - Appx.pdf
- __MACOSX/9605_C.Oh et.al - Supp/._9605_C.Oh et.al - Appx.pdf
